# Supplementary material
Source: PubMed Central journal article supplement (PMC3804008)
Supplement: NIHMS516103-supplement-2.pdf [file NIHMS516103-supplement-2.pdf]

**Appendix Table 1: Percent of Medicare Advantage Enrollees with Continuous Enrollment among Decedents and Non-Decedents, 2003-2009**

**MA Enrollment Status at Month of Death, by Month**

**Members Enrolled in January of Each Year**

|            | <b>2009</b> | <b>2008</b> | <b>2007</b> | <b>2006</b> | <b>2005</b> | <b>2004</b> | <b>2003</b> |
|------------|-------------|-------------|-------------|-------------|-------------|-------------|-------------|
| <b>Jan</b> | 100.0%      | 100.0%      | 100.0%      | 100.0%      | 100.0%      | 100.0%      | 100.0%      |
| <b>Feb</b> | 98.9%       | 98.8%       | 98.5%       | 95.6%       | 95.9%       | 98.6%       | 98.7%       |
| <b>Mar</b> | 98.8%       | 98.3%       | 97.6%       | 96.5%       | 94.8%       | 98.2%       | 97.9%       |
| <b>Apr</b> | 98.2%       | 98.1%       | 97.3%       | 95.7%       | 94.5%       | 97.0%       | 96.8%       |
| <b>May</b> | 97.7%       | 97.3%       | 96.7%       | 95.5%       | 94.8%       | 96.6%       | 96.8%       |
| <b>Jun</b> | 97.7%       | 97.3%       | 96.9%       | 95.2%       | 94.3%       | 96.4%       | 96.6%       |
| <b>Jul</b> | 97.6%       | 97.2%       | 95.5%       | 94.9%       | 92.8%       | 95.9%       | 96.2%       |
| <b>Aug</b> | 97.5%       | 96.0%       | 96.2%       | 95.1%       | 93.7%       | 96.1%       | 95.7%       |
| <b>Sep</b> | 97.2%       | 95.2%       | 96.3%       | 94.8%       | 92.7%       | 95.8%       | 95.0%       |
| <b>Oct</b> | 97.0%       | 95.3%       | 95.6%       | 94.8%       | 92.7%       | 95.9%       | 95.4%       |
| <b>Nov</b> | 97.1%       | 95.1%       | 95.9%       | 94.3%       | 94.1%       | 95.8%       | 94.7%       |
| <b>Dec</b> | 96.5%       | 95.0%       | 95.6%       | 93.7%       | 93.9%       | 94.5%       | 95.1%       |

**MA Enrollment by Month, Non-Decedents**

**Members Enrolled in January of Each Year**

|            | <b>2009</b> | <b>2008</b> | <b>2007</b> | <b>2006</b> | <b>2005</b> | <b>2004</b> | <b>2003</b> |
|------------|-------------|-------------|-------------|-------------|-------------|-------------|-------------|
| <b>Jan</b> | 100.0%      | 100.0%      | 100.0%      | 100.0%      | 100.0%      | 100.0%      | 100.0%      |
| <b>Feb</b> | 99.7%       | 99.6%       | 99.5%       | 99.3%       | 99.6%       | 99.6%       | 99.4%       |
| <b>Mar</b> | 99.4%       | 99.3%       | 99.1%       | 98.7%       | 99.4%       | 99.3%       | 99.0%       |
| <b>Apr</b> | 99.2%       | 99.0%       | 98.7%       | 98.3%       | 99.1%       | 99.0%       | 98.6%       |
| <b>May</b> | 99.0%       | 98.9%       | 98.4%       | 97.9%       | 98.9%       | 98.8%       | 98.3%       |
| <b>Jun</b> | 98.9%       | 98.8%       | 98.3%       | 97.5%       | 98.7%       | 98.5%       | 97.9%       |
| <b>Jul</b> | 98.8%       | 98.6%       | 98.1%       | 97.4%       | 98.5%       | 98.3%       | 97.7%       |
| <b>Aug</b> | 98.6%       | 98.2%       | 98.0%       | 97.2%       | 98.3%       | 98.1%       | 97.4%       |
| <b>Sep</b> | 98.5%       | 97.7%       | 97.9%       | 97.1%       | 98.2%       | 97.9%       | 97.1%       |
| <b>Oct</b> | 98.3%       | 97.6%       | 97.7%       | 96.9%       | 98.0%       | 97.7%       | 96.9%       |
| <b>Nov</b> | 98.2%       | 97.5%       | 97.6%       | 96.8%       | 97.9%       | 97.5%       | 96.6%       |
| <b>Dec</b> | 98.1%       | 97.4%       | 97.4%       | 96.5%       | 97.7%       | 97.4%       | 96.4%       |

Exhibit shows continuous enrollment for decedents and non-decedents in MA plans, by month. For decedents, values show the percent who were continuously enrolled in MA from January 1 until their death. For non-decedents, values show the percent who were continuously enrolled from January 1 until the end of each month.
